# Supplementary material for: Polyethyleneimine-grafted hyperbranched conjugated polyelectrolytes: synthesis and imaging of gene delivery
Source: Royal Society of Chemistry journal article supplement (doi:10.1039/c3py00020f), 2013-01-01
Supplement: c3py00020f.pdf [file c3py00020f.pdf]

# Supporting Information

## Polyethyleneimine-Grafted Hyperbranched Conjugated

## Polyelectrolytes: Synthesis and Imaging of Gene Delivery

By Guan Wang,<sup>1,4</sup> § Hui Yin,<sup>2</sup> § Jason Cheuk Yin Ng,<sup>3</sup> Liping Cai,<sup>1</sup> Jun Li,<sup>2,4\*</sup> Ben Zhong Tang<sup>3,4</sup> and Bin Liu<sup>1,4\*</sup>

1. Department of Chemical & Biomolecular Engineering, National University of Singapore

2. Department of Bioengineering, National University of Singapore

3. Department of Chemistry, The Hong Kong University of Science & Technology

4. Institute of Materials Research & Engineering, Singapore

§ These authors contribute equally to the work

\* Corresponding authors. E-mails: [cheliub@nus.edu.sg](mailto:cheliub@nus.edu.sg); [jun-li@nus.edu.sg](mailto:jun-li@nus.edu.sg).

### 1. <sup>1</sup>H NMR spectra for HCP, HCPE, HCPEPEG, HCPEPEI-1, HCPEPEI-2 and details of calculation for N contents

The integration at 3.17 ppm has a ratio of 0.06 to that at 2.03 ppm, indicating 76% of the alkyne groups have been reacted. The number of newly formed benzene rings is 7 and degree of polymerization is 15. The  $M_n$  is estimated to be ~16000. After quaternization, the  $M_n$  is ~19000. After conjugation to 8 PEG chains, the  $M_n$  is ~23000. The integration ratios for peaks at 2.5 to 3.1 ppm ( $N^+(\underline{CH}_3)_3$  and PEI protons) to that at 3.65 ppm (PEG protons) are 3.0 and 5.7 for HCPEPEI-1 and HCPEPEI-2, respectively. The 8 PEG chains gave totally ~320 protons for both HCPEPEI-1 and HCPEPEI-2. After deducting the protons from  $N^+(\underline{CH}_3)_3$ , there are ~420 and ~1284 PEI protons for HCPEPEI-1 and HCPEPEI-2, respectively. PEI600 has 14  $NCH_2CH_2$  repeating units, and PEI1800 has 42  $NCH_2CH_2$  repeating units. The number of protons for PEI ( $M_n = 600$ ) is 56 and that for PEI ( $M_n = 1800$ ) is 168. There are  $420/56 = 7.5$  mol of PEI600 and  $1284/168 = 7.6$  mol of PEI1800 conjugated to each HCPEPEG. The molecular weights for HCPEPEI-1 and HCPEPEI-2 are estimated to be

~31800 and ~41400. The N contents are ~5%, ~13% for HCPEPEI-1 and HCPEPEI-2, respectively.

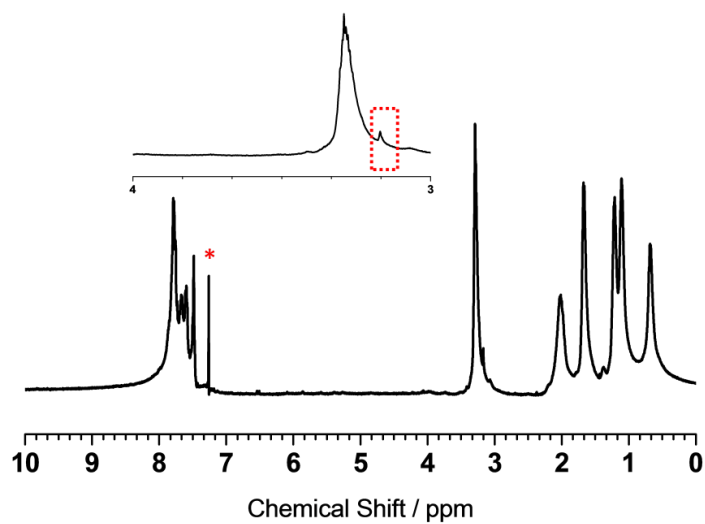

**Figure S1.**  $^1\text{H}$  NMR spectrum of HCP in  $\text{CDCl}_3$ . \* indicates solvent peak.

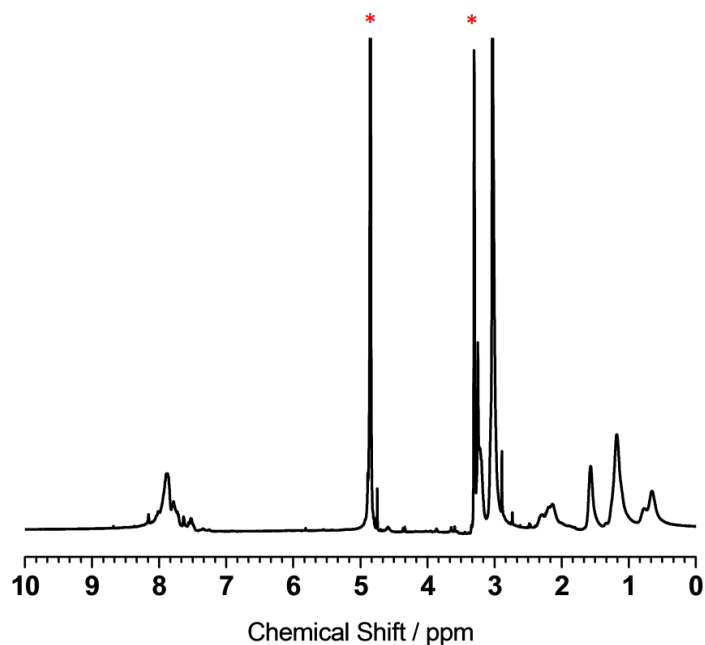

**Figure S2.**  $^1\text{H}$  NMR spectrum of HCPE in  $\text{MeOD}$ . \* indicates solvent peak and water peak.

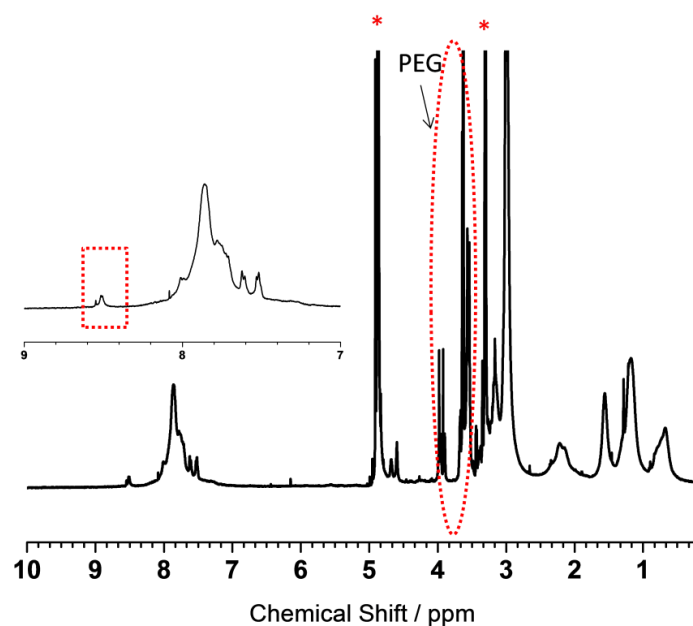

**Figure S3.**  $^1\text{H}$  NMR spectrum of HCPEPEG in MeOD. \* indicates solvent peak and water peak.

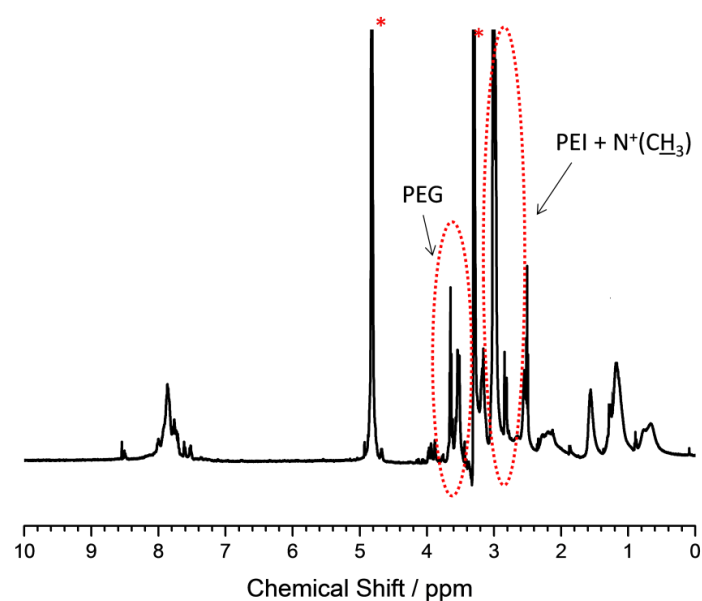

**Figure S4.**  $^1\text{H}$  NMR spectrum of HCPEPEI-1 in MeOD. \* indicates solvent peak and water peak.

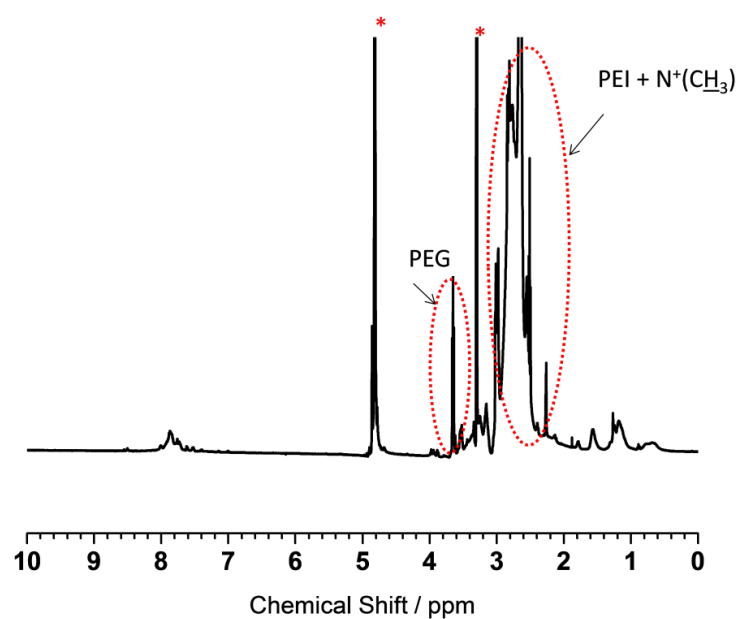

**Figure S5.**  $^1\text{H}$  NMR spectrum of HCPEPEI-2 in MeOD. \* indicates solvent peak and water peak.

## 2. The DLS results of HCPEPEI-1 and HCPEPEI-2 in $\text{H}_2\text{O}$

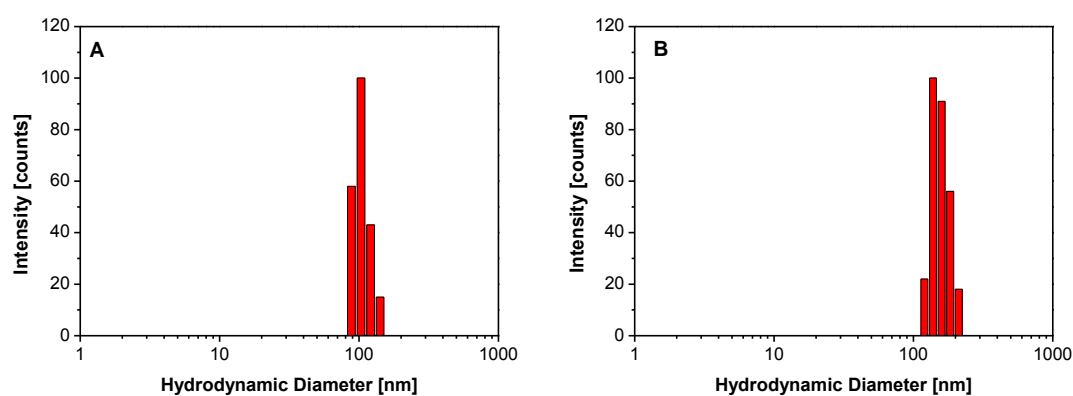

**Figure S6.** DLS spectra of HCPEPEI-1 (A) and HCPEPEI-2 (B) in  $\text{H}_2\text{O}$ .

## 3. Cytotoxicity study

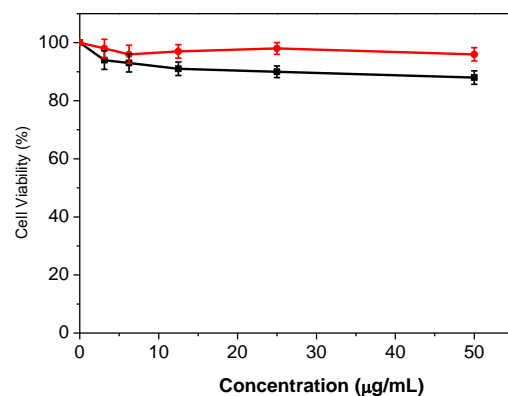

**Figure S7.** COS-7 cells viability of HCPE (black) and PEG (red) at different concentrations for 24 h.

#### 4. Characterization of polymer/DNA nanoparticles

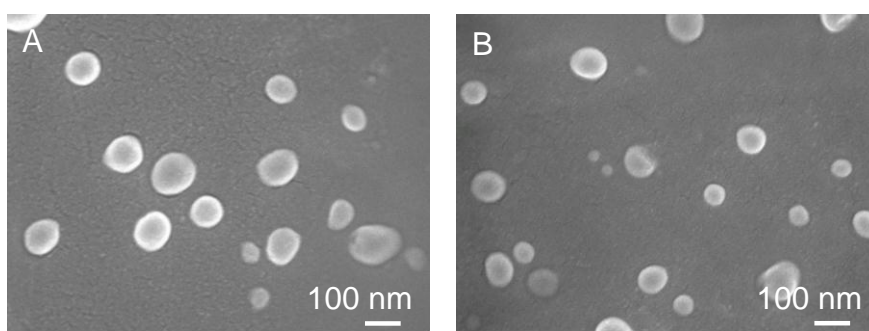

**Figure S8.** SEM images of HCPEPEI-1/DNA (A) and HCPEPEI-2/DNA (B) nanoparticles at N/P ratio of 30.

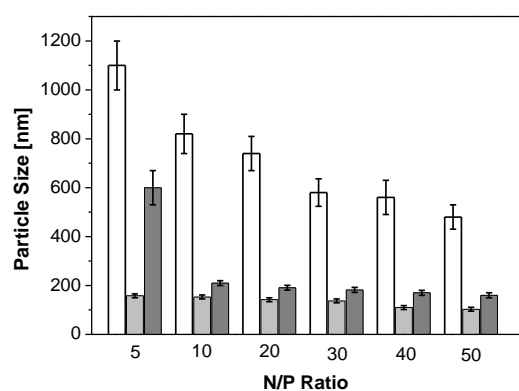

**Figure S9.** Particle sizes PEI600/DNA (white), PEI1800/DNA (light gray) and PEI25k/DNA (gray) nanoparticles as a function of the N/P ratio.

#### 5. In vitro gene transfection study

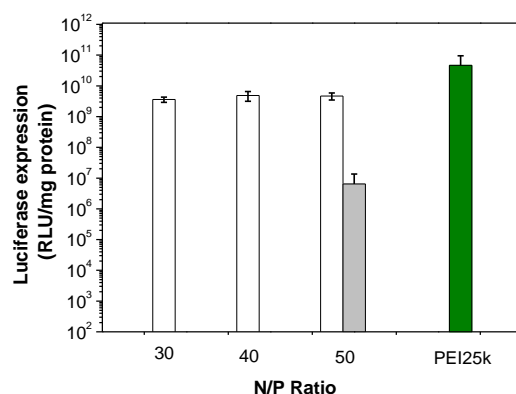

**Figure S10.** In vitro gene transfection efficiency of PEI600/DNA (gray) and PEI1800/DNA complex (white) in COS-7 cells in the absence of serum at 24 h post-transfection. The green column shows the tranfection efficiency of PEI25k/DNA complex at an optimal N/P ratio of 30.

## 6. Photostability study

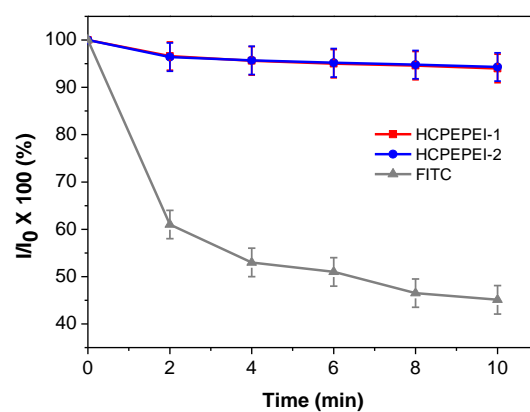

**Figure S11.** Photostability comparison among HCPEPEI-1, HCPEPEI-2 and FITC upon continuous laser excitation at 405 nm for 0 to 10 min.  $I_0$  is the initial fluorescence intensity;  $I$  is the fluorescence intensity of the sample at various time points.
